# Supplementary material for: Could HPV Testing on Self-collected Samples Be Routinely Used in an Organized Cervical Screening Program? A Modeled Analysis
Source: Oxford University Press journal article supplement (doi:10.1158/1055-9965.epi-20-0998), 2020-11-20
Supplement: 10559965epi200998-sup-246380_2_supp_6642505_qg42mg.xlsx [file 10559965epi200998-sup-246380_2_supp_6642505_qg42mg.xlsx]

## Sheet: HPV-FRAME ReportingList
Domain	Inputs	Reported by age? (Y/N)	Report by sex (F/M/Both)?	Comments
CRS	Target population for intervention	Y	F only	Methods section
CRS	Sexual behaviour	N/A	Y	Online Policy1 documentation [18], pp 3-4; cited publication Smith et al IJC 2008 [17]
CRS	Cohort examined for evaluation/ time horizon	Y	F only	Methods section
CRS	Quality of life assumptions	N/A	N/A	Reported outcomes were cancer cases, deaths, and life-years only
CRS	Calibration	Y	F only	Online Policy1 documentation [18], pp 8-26
CRS	Validation (where possible)	N	N/A
CRS	Costs	N/A	N/A	Not a cost-effectiveness evaluation
2	Vaccine coverage at older ages
1	Vaccine uptake	Y	Y	Table 1
1	Vaccine efficacy	Assumed invariant by age	Assumed invariant by sex	Table 1; 100% all ages (if not currently infected)
1	Vaccine cross-protection	Assumed invariant by age	Assumed invariant by sex	Table 1; No cross-protection
1	Duration vaccine protection and waning	Assumed invariant by age	Assumed invariant by sex	Lifelong duration all ages (in those not currently infected at time of vaccination)
1	Vaccine and delivery costs	N/A	N/A	Not a cost-effectiveness evaluation
1	Pre-vaccination disease burden (including population attributable fractions for HPV)	Y	F only	Online Policy1 documentation [18], pp 8-26
1	Heterogeneity in sexual behaviour	N	N/A	Dynamic model with 4 sexual behaviour groups. Behavioural and mixing assumptions are described in cited previous publications [16,17].
1	Duration of natural immunity	N/A		Reported in online Policy1 documentation [18], p 4; and cited previous publications of Policy1-Cervix (Smith et al, Vaccine 2011:9112-22 [16])
2	Natural history parameters, specifically for older individuals: structure; rate of infection clearance; loss of natural immunity; simulation of latency
3	MSM-specific disease burden
3	Interaction between HIV and HPV
3	Prior exposure
4	HPV prevalence, CIN prevalence and cervical cancer incidence by HIV status
4	HPV disease multipliers on HPV acquisition, progression from HPV infection to cancer (or relevant precursors, if modelled) for HIV-infected women/men
4	HPV-associated cancer mortality by HIV status (and CD4 count if modelled)
4	Relevant co-morbidities
4	HPV-associated screening sensitivity/specificity by HIV status
5	HIV prevalence rates, if endemic in country
5	Description of any opportunistic or pilot/demonstration screening projects ongoing
6	Routine screening behaviour (routine and follow- up and test-of-cure)	N	F only	Reported in cited previous publications of Policy1-Cervix [10].
6	Screening test(s) and colposcopy accuracies	N	N/A	Table 1 and Appendix
6	Abnormal test management (primary and triage)	Assumed invariant by age	F only	As per Australian guidelines [6] and previous publications [13,14] cited in Methods section
6	Diagnostic follow-up of abnormal tests	Y	F only	As per Australian guidelines [6] and previous publications [13,14] cited in Methods section
6	Management by disease grade (confirmed disease)	N	N/A	As per Australian guidelines [6] and previous publications [13,14] cited in Methods section
6	Sources of information for screening structure and parameterization	Y, ages 20-75 years	N/A	Australian guidelines [6]; parameterization reported in cited previous publication [10]
6	Herd effects	N	N	Herd effects from vaccination are included; online Policy1 documentation [18], pp 6-7
6	Association between vaccination and screening uptake	Assumed invariant by age	F only	Screening compliance and vacciantion compliance rates are assumed indepentent of each other.
6	Fixed – variable costs	N/A	N/A	Not a cost-effectiveness evaluation
7	Timing between doses (for 2-dose)
	a) Outputs	Reported by age? (Y/N)	Report by sex (F/M/Both)?	Comments
CRS	Cancer incidence, mortality, life years, QALYs/DALYs (as appropriate)	N	F only	Reported outcomes were cervical cancer cases and deaths, and life-years, reported combined across all ages over the lifetime of females born 2006.
CRS	HPV prevalence, pre-intervention	Y	F only	Online Policy1-Cervix documentation [18] Figure 3
CRS	CIN2/3 detected	Y	F only	Pre-intervention; online Policy1-Cervix documentation [18] Figure 7
CRS	Sensitivity analysis on key inputs	Assumed invariant by age	F only	Scenarios include a range of feasible uptake of screening among women who otherwise would not attend at a given timepoint (15-80%), informed by data. Test sensitivity deliberately set at worst case value (reporting on a scenario where self-collection has equivalent sensitivity to HPV testing on clinician-collected samples is redundant because model outputs would be identical to those for clinicia…
CRS	Incremental cost-effectiveness ratios and costs saved	N/A	N/A	Not a cost-effectiveness evaluation
1	Absolute reductions in HPV infections, and/or warts, post-vaccination	N	N	Reported outcomes were cervical cancer cases and deaths, and life-years, reported combined across all ages over the lifetime of females born 2006.
1	Absolute reductions in CIN2+ post-vaccination	N	N	Reported outcomes were cervical cancer cases and deaths, and life-years, reported combined across all ages over the lifetime of females born 2006.
1	Absolute reductions in invasive cancer (cervical and other HPV cancers, as relevant) post-vaccination	N/A	N/A	Not an evaluation of HPV vaccination
4	Reduction in cervical cancer incidence over time by HIV status (and CD4 count and ART status if modelled)
7	Threshold cost per vaccine dose

## Sheet: Domains
Source:	HPV-FRAME: A consensus statement and quality framework for modelled evaluations of HPV-related cancer control.
	Canfell et al, Papillomavirus Research 2019;8:100184. doi: 10.1016/j.pvr.2019.100184
Domain	Description	Also uses	Potentially uses (depending on research question)
CRS	Core reporting standards	n/a		*
1	Vaccination in adolescents	6*	6	*
2	Vaccination in adults	1, 6*	6
3	Vaccination in MSM	1,2
4	Models of HPV-associated cancers among individuals living with HIV (ILWH).		any/ all others
5	HPV prevention in LMIC		any/ all others
6	Cervical screening (including integrated vaccination and screening)		any/ all others	*
7	Alternative vaccine types or reduced-dose schedules	1 and/or 2	any/ all others
	6* screening should be included for countries where significant screening exists
